# Supplementary material for: Single cell correlation analysis of liquid and solid biopsies in metastatic colorectal cancer
Source: PubMed Central journal article supplement (PMC6925029; doi:10.18632/oncotarget.27271), 2019-12-17
Supplement: oncotarget-10-7016-s001.pdf [file oncotarget-10-7016-s001.pdf]

## Single cell correlation analysis of liquid and solid biopsies in metastatic colorectal cancer

### SUPPLEMENTARY MATERIALS

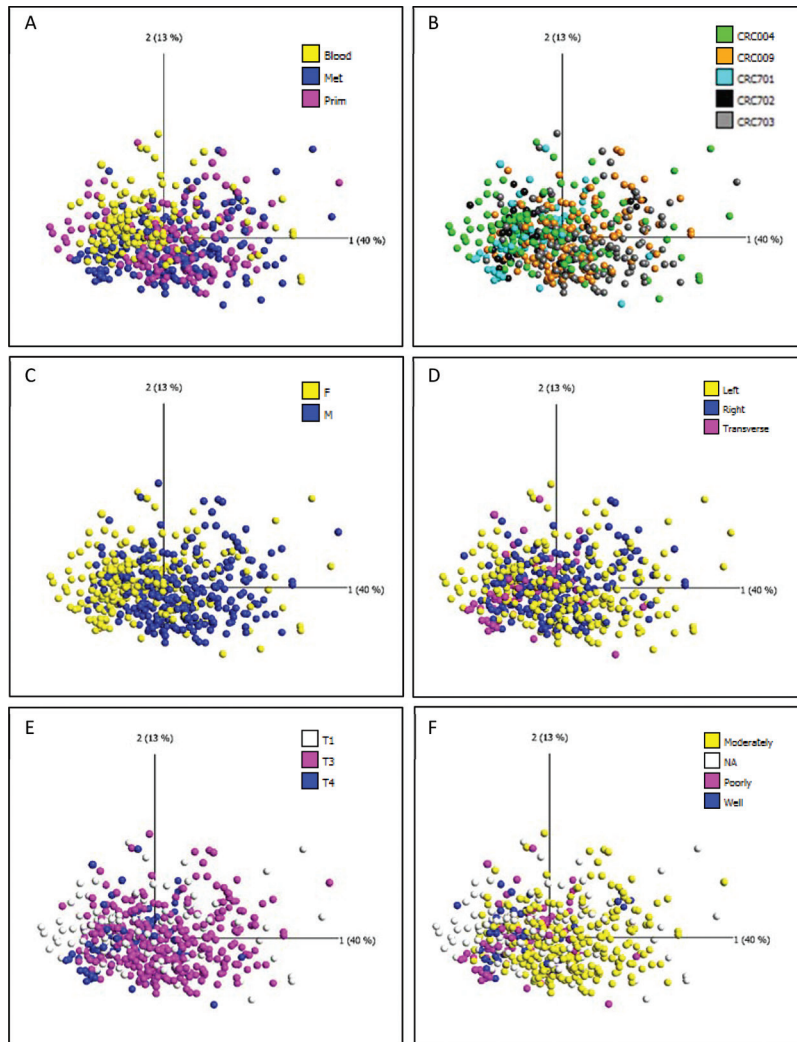

**Supplementary Figure 1: Principal component analysis with samples from the first five patients analyzed (974 single cells).** Cells are colored by (A) tissue type, (B) patient, (C) gender, (D) colon location of primary tumor, (E) primary tumor stage, (F) primary tumor differentiation.

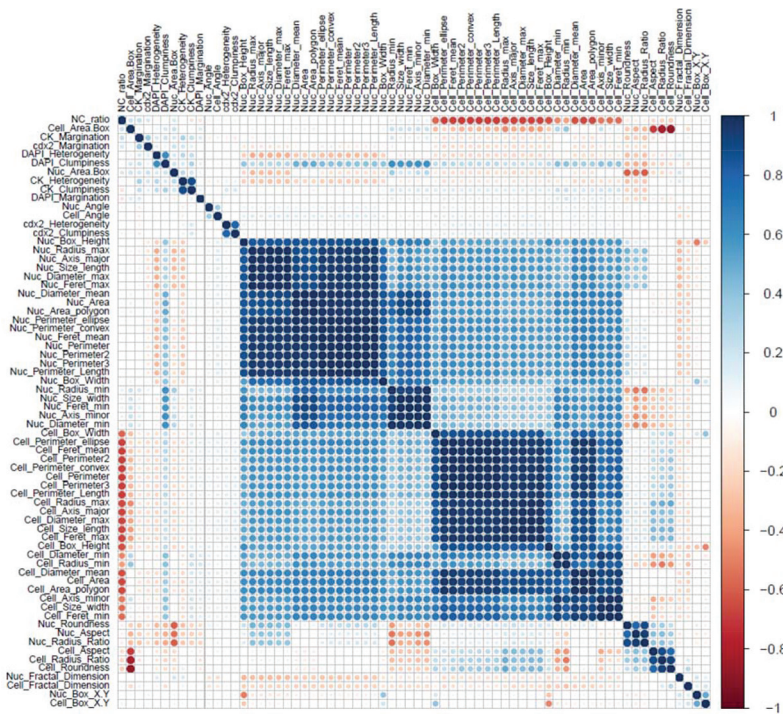

**Supplementary Figure 2: Spearman correlation based on data from the complete set of liquid and solid biopsy cells from ten CRC patients.** The variables are ordered by hierarchical clustering. The color bar ranges from blue (positive correlation) to red (negative correlation).

**Supplementary Table 1: Effect sizes for liquid and solid biopsy single cell comparison.**

|                              | CRC-SC004    | CRC-SC009    |               | CRC-USC701   | CRC-USC702   | CRC-USC703   |               |                  |
|------------------------------|--------------|--------------|---------------|--------------|--------------|--------------|---------------|------------------|
|                              | CTCs vs met. | CTCs vs met. | CTCs vs prim. | CTCs vs met. | CTCs vs met. | CTCs vs met. | CTCs vs prim. | Mean effect size |
| <i>No. of cells measured</i> | 62 vs 38     | 25 vs 30     | 25 vs 28      | 29 vs 26     | 15 vs 19     | 24 vs 48     | 24 vs 49      |                  |
| Nuclear Area                 | 0.47         | 1.66         | 0.13          | 0.55         | 0.34         | 1.96         | 1.60          | 0.96             |
| DAPI Den./Inten. (mean)      | 1.33         | 2.01         | 0.71          | 3.22         | 2.49         | 1.59         | 1.50          | 1.84             |
| Nuclear Roundness            | 0.35         | 1.47         | 1.89          | 2.00         | 0.35         | 0.93         | 0.34          | 1.05             |
| Cell Area                    | 0.17         | 1.46         | 1.03          | 0.60         | 0.72         | 1.01         | 0.57          | 0.79             |
| CK Den./Inten. (mean)        | 3.01         | 2.04         | 2.87          | 2.96         | 3.5          | 3.8          | 2.57          | 2.96             |
| Cell Roundness               | 0.38         | 0.17         | 0.22          | 0.07         | 0.18         | 0.11         | 0.09          | 0.17             |
| CDX2 Den./Inten. (mean)      | 1.50         | 1.20         | 4.19          | 1.18         | 0.65         | 0.60         | 0.13          | 1.35             |
| N/C-ratio                    | 0.43         | 0.54         | 0.87          | 0.78         | 0.10         | 0.61         | 0.57          | 0.56             |
| Mean effect size             | 0.96         | 1.32         | 1.49          | 1.42         | 1.04         | 1.33         | 0.92          | 1.21             |

Effect sizes computed for a subset of 8 features. Values are colored according to effect size, from white to dark blue for trivial, small, moderate and large difference effects.

**Supplementary Table 2: Intra-patient solid and liquid biopsy cell comparison.**

See Supplementary Table 2: Red=higher and green=lower in solid versus liquid biopsy cells ( $p < 0.01$ ). Only features with significant differences in one or more patients are listed
